# Supplementary material for: Regulation of ATP utilization during metastatic cell migration by collagen architecture
Source: PubMed Central journal article supplement — Mol Biol Cell. 2018 Jan 1;29(1):1–9. doi: 10.1091/mbc.E17-01-0041 (PMC5746062; doi:10.1091/mbc.e17-01-0041), 2018-01-01
Supplement: supp_E17-01-0041v1_E17-01-0041SupplementalFigures.pdf [file supp_E17-01-0041v1_E17-01-0041SupplementalFigures.pdf]

# Supplemental Materials

*Molecular Biology of the Cell*

Zanotelli et al.

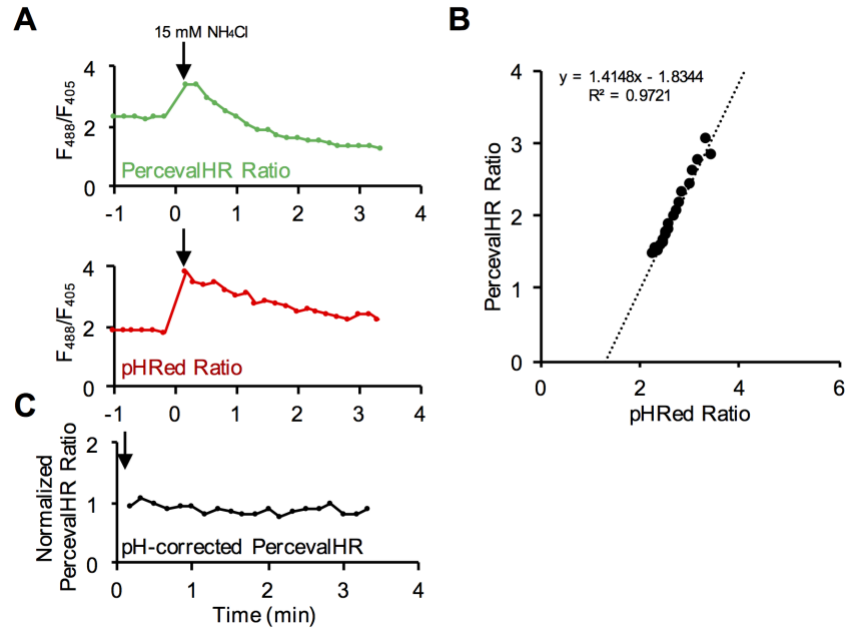

**Supplemental Figure S1. pH calibration of PercevalHR signal.** (A) Raw PercevalHR ratiometric signal and (B) raw pHRed ratiometric signal of a single cell after the addition of 15 mM  $\text{NH}_4\text{Cl}$  to induce intracellular alkalinization. (B) A relationship between the PercevalHR signal and pHRed signal shows a linear correlation demonstrating the pH sensitivity of PercevalHR, which can be used to correct of pH bias ( $n = 5$  cells). (C) pH-corrected PercevalHR signal.

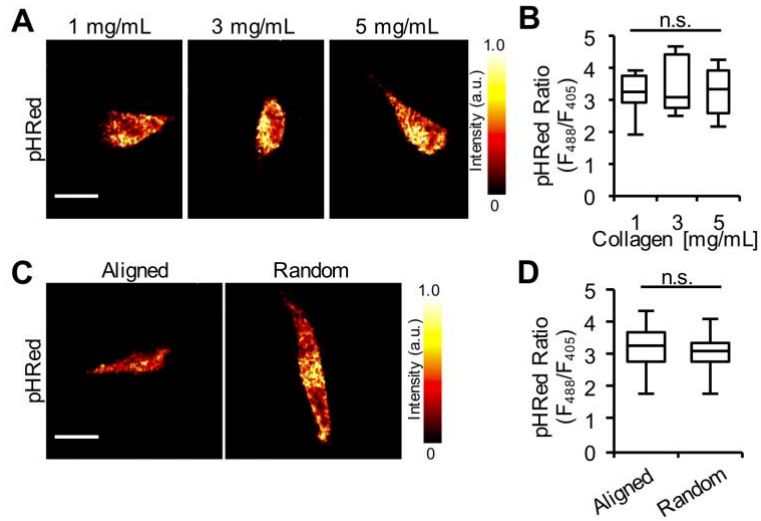

**Supplemental Figure S2. Changes in intracellular pH across 3D matrix conditions.** (A) Representative pHRed ratios of MDA-MB-231 cells co-expressing PercevalHR and pHRed cultured in a 1, 3, and 5 mg/mL collagen matrix, and (B) quantification of pHRed ratios ( $n = 30$  cells from three independent experiments). (C) Representative pHRed ratios of MDA-MB-231 cells co-expressing PercevalHR and pHRed cultured in an aligned and randomly oriented 1.5 mg/mL three-dimensional collagen matrix, and (D) quantification of pHRed ratios ( $n = 40$  cells from three independent experiments). Box and whisker plots show medians and 25<sup>th</sup>/75<sup>th</sup> and 5<sup>th</sup>/95<sup>th</sup> percentiles. n.s.=not significant for (B) one-way ANOVA with Tukey's HSD post-hoc test and (D) Wilcoxon rank test. Scale bars = 20  $\mu$ m.
